1 **A Genome-Wide Association Study of Non-Photochemical**  
2 **Quenching in response to local seasonal climates in *Arabidopsis***  
3 ***thaliana***

4  
5  
6 **Authors**

7 Tepsuda Rungrat<sup>1,2,\*</sup>, Andrew A. Almonte<sup>2,\*</sup>, Riyan Cheng<sup>3</sup>, Peter J. Gollan<sup>4</sup>, Tim  
8 Stuart<sup>5</sup>, Eva-Mari Aro<sup>4</sup>, Justin O. Borevitz<sup>2</sup>, Barry Pogson<sup>2</sup> and Pip B. Wilson<sup>2,†</sup>

9  
10 <sup>1</sup>Faculty of Agriculture, Natural resources and Environment, Naresuan University,  
11 Thailand; <sup>2</sup>ARC Centre of Excellence for Plant Energy Biology, Australian National  
12 University, Canberra, Australia; <sup>3</sup>Department of Psychiatry, University of California  
13 San Diego, La Jolla, CA 92093, USA; <sup>4</sup> Faculty of Engineering and Science,  
14 University of Turku, Turku, Finland; <sup>5</sup>ARC Centre of Excellence for Plant Energy  
15 Biology, University of Western Australia, Perth, Australia

16  
17 \* These authors contributed equally to this work

18 † Corresponding author: pipbwilson@gmail.com

19  
20 **Abstract**

21  
22 Field-grown plants have variable exposure to sunlight as a result of shifting cloud-  
23 cover, seasonal changes, canopy shading, and other environmental factors. As a  
24 result, they need to have developed a method for dissipating excess energy obtained  
25 from periodic excessive sunlight exposure. Non-photochemical quenching (NPQ)  
26 dissipates excess energy as heat, however the physical and molecular genetic  
27 mechanics of NPQ variation are not understood. In this study, we investigated the  
28 genetic loci involved in NPQ by first growing different *Arabidopsis thaliana*  
29 accessions in local and seasonal climate conditions, then measured their NPQ  
30 kinetics through development by chlorophyll fluorescence. We used genome-wide  
31 association studies (GWAS) to identify 15 significant quantitative trait loci (QTL) for a  
32 range of photosynthetic traits, including a QTL co-located with known NPQ gene  
33 *PSBS* (AT1G44575). We found there were large alternative regulatory segments  
34 between the *PSBS* promoter regions of the functional haplotypes and a significant  
35 difference in *PsbS* protein concentration. These findings parallel studies in rice  
36 showing recurrent regulatory evolution of this gene. The variation in the *PSBS*  
37 promoter and the changes underlying other QTLs could give insight to allow  
38 manipulations of NPQ in crops to improve their photosynthetic efficiency and yield.

39  
40  
41 *B.P. & J.B. conceived the project; B.P., J.B., P.W. and T.R. designed the research plan and analysis; P.W.*  
42 *supervised the experiments; T.R. performed most of the experiments and analysis; P.G., T.S., A.A. & E.A.*  
43 *designed and undertook experimental design, experiments and analysis for Figure 4; R.C. did the GWAS*  
44 *analysis; P.W., T.R. & A.A. wrote the article with contributions of all the authors.*

45  
46 **Keywords:** GWAS, *Arabidopsis*, photoprotection, natural variation, acclimation

47

## 48 INTRODUCTION

49 Photosynthesis is the process of harnessing light energy to power CO<sub>2</sub> fixation.  
50 Variability in light environments of a plant or leaf caused by clouds or canopy  
51 shading can often result in rapid switching between limited or excess light exposure  
52 in relation to the acclimated state. Excess light can result in the production of  
53 damaging reactive oxygen species, which can impair leaf photosynthesis even after  
54 return to low light. Plants have evolved a method to dissipate excess light energy  
55 from the major light-harvesting antennae as heat through a photoprotective  
56 mechanism known as non-photochemical quenching (NPQ; Reviewed in Ruban,  
57 2016). This process can eliminate over 75% of absorbed light energy (Niyogi,  
58 Grossman, & Bjorkman, 1998) and modified regulation of NPQ has been shown to  
59 improve photosynthetic efficiency and increase biomass in field-grown tobacco  
60 (Kromdijk et al., 2016).

61

62 In vascular plants, the NPQ mechanism is generally classified into two main  
63 components: energy-dependent quenching (qE) and photoinhibition quenching (qI;  
64 Ruban, 2016). qE is recognized as the most significant component of NPQ and can  
65 be rapidly increased and relaxed within seconds to minutes. qE is triggered by a  
66 decrease in the thylakoid lumen pH (Briantais, Verrotte, Picaud, & Krause, 1979),  
67 which induces thermal dissipation through protonation of the PsbS protein, as well as  
68 the serial de-epoxidation of violaxanthin to antheraxanthin and then zeaxanthin  
69 through the xanthophyll cycle (Reviewed in Demmig-Adams & Adams, 1992; Jahns  
70 & Holzwarth, 2012). Conformational changes in the light-harvesting antennae  
71 activated during qE involve monomerization of PsbS (Correa-Galvis, Poschmann,

72 Melzer, Stuhler, & Jahns, 2016; X. P. Li et al., 2004); however, the precise role of  
73 PsbS in the dissipation of excess energy is as yet unclear.

74

75 The worldwide Arabidopsis collection contains natural diversity in a range of traits  
76 that have resulted from adaptation to a wide range of climate types, and significant  
77 variation in NPQ was observed in a study of 62 diverse Arabidopsis accessions  
78 (Jung & Niyogi, 2009). The mapping of biparental populations from contrasting  
79 accessions has identified several novel loci involved in NPQ, including reinforcing  
80 the role of *PSBS* (Jung & Niyogi, 2009). However, to our knowledge, no studies have  
81 undertaken genome wide association studies (GWAS) on NPQ in Arabidopsis.  
82 GWAS surveys a much wider range of genetic diversity than bi-parental populations  
83 and also provides greater resolution for mapping quantitative trait loci (QTL) to assist  
84 in gene discovery. The utility of GWAS for NPQ has already been demonstrated  
85 through the characterization of 33 QTL in rice (Wang et al., 2017) and 15 QTL in  
86 soybean (Herritt, Dhanapal, & Fritschi, 2016).

87

88 The use of high-throughput phenotyping platforms that measure photoprotective  
89 traits using chlorophyll fluorescence have proven to be useful methods for monitoring  
90 real-time plant stress responses in model species such as Arabidopsis (Rousseau et  
91 al., 2013; Rungrat et al., 2016; van Rooijen, Aarts, & Harbinson, 2015). Phenotyping  
92 platforms such as PlantScreen can measure large numbers of plants simultaneously  
93 to reveal the photosynthetic performance of whole rosettes. Additionally, modified  
94 growth chambers can be used to precisely mimic external climates (Brown et al.,  
95 2014) without the noise of field conditions, facilitating the assessment of the impact  
96 of genetic variations on responses to even minor environmental variation. Combined

97 with the extensive genetic resources available for Arabidopsis (1001 Genomes  
98 Consortium, 2016; Y. Li, Huang, Bergelson, Nordborg, & Borevitz, 2010; Zhang,  
99 Hause, & Borevitz, 2012), these tools enable the dissection of the genetic  
100 architecture underlying important photoprotective traits such as NPQ and their  
101 response to different environmental conditions.

102

103 In this study, we focus on identifying the effect of contrasting climates (in the form of  
104 differing light intensities and temperature profiles) on the kinetics of NPQ in several  
105 Arabidopsis accessions from the global diversity set. We then use GWAS to reveal  
106 the genetic basis underlying NPQ and its response to the environment. With these  
107 methods, we aim to better understand the genetic framework of this important  
108 physiological pathway in its response to excess light energy that occurs in natural  
109 environments.

110

## 111 **MATERIAL AND METHODS**

### 112 **Plant growth**

113 For GWAS, 284 genetically diverse Arabidopsis accessions were selected from the  
114 global HapMap set (Y. Li et al., 2010). Two photoprotective mutants (*npq1* and *npq4*;  
115 Y. Li et al., 2010; Niyogi et al., 1998) were included as controls for reduced NPQ.  
116 *npq1* is a loss of function mutant in violaxanthin de-epoxidase 1 (VxDE; AT1G08550)  
117 while *npq4* is a loss of function mutant in *PSBS* (AT1G44575). Most accessions had  
118 one replicate per environmental condition while 16 replicates of Col-0 were included  
119 in each condition to monitor the extent of spatial variation within the chamber and  
120 four replicates of *npq4* were included in the late autumn conditions. Seed  
121 germination was synchronised by stratification at 4°C in the dark in sterilised water

122 for 4-5 days. Plants were grown in pots (4 cm x 4 cm x 7 cm) of pasteurised seed  
123 raising mix (Debco seed raising mix, Scotts Australia) without further fertilisation in  
124 specially modified climate chambers (Brown et al., 2014) housed in the plant growth  
125 facility of the Australian Plant Phenomics Facility at the ANU. These chambers have  
126 been fitted with 7-bands LED light panels and are programmed to alter light intensity,  
127 light spectrum, air temperature and relative humidity every 5 minutes. Climatic  
128 conditions were modelled using SolarCalc software (Spokas & Forcella, 2006). In  
129 this study, two experiments were run with diurnal and seasonal temperature  
130 fluctuations with two climates in each experiment set to simulate coastal  
131 (Wollongong: -34.425, 150.893) and inland (Goulburn: -34.426, 150.892) regions of  
132 South East Australia. The first experiment was conducted by simulating a typical  
133 late-autumn season starting from April 1st, 2014 and ending on June 5th, 2014. The  
134 second experiment was conducted to simulate an early autumn season, starting from  
135 March 15th, 2015 and finishing on May 7th, 2015. The maximum light intensity at  
136 noon was around 150  $\mu\text{mol photons m}^{-2}\text{s}^{-1}$  and 300  $\mu\text{mol photons m}^{-2}\text{s}^{-1}$  for Coastal  
137 and Inland, respectively, in both experiments. These are typical light intensities for  
138 growing *Arabidopsis thaliana* (Bölter, Seiler, & Soll, 2018). The temperature ranged  
139 between 14°C - 23°C and 10°C - 23°C for Coastal-Late Autumn and Inland-Late  
140 Autumn respectively, and these temperatures decreased to 10°C - 18°C and 5°C -  
141 15°C by the end of the experiment due to seasonal change to winter. The  
142 temperature ranged between 10°C - 25°C and 5°C - 25°C for Coastal-Early Autumn  
143 and Inland-Late Autumn respectively, and these temperatures decreased to 10°C -  
144 18°C and 5°C - 18°C by the end of the experiment due to seasonal change to winter.

145

146 **NPQ quantification by chlorophyll fluorescence measurement**

147 Photosynthesis parameters were measured by pulse amplitude modulation  
148 chlorophyll fluorescence using the automated PlantScreen system (Photon Systems  
149 Instruments, Czech Republic) when plants were at 25 and 40 days of age and at 14  
150 and 16 leaves stages. All measurements began at midday and finished by 5:00 pm.  
151 Chlorophyll fluorescence kinetics were monitored during illumination of actinic light  
152 ( $700 \mu\text{mol m}^{-2}\text{s}^{-1}$ ) and saturation flashes ( $800\text{ms}$ ,  $2800 \mu\text{mol m}^{-2}\text{s}^{-1}$ ) and analysed  
153 using FluorCam7 software. To focus on the major qE component, a custom-made  
154 chlorophyll fluorescence measurement protocol was used (P3; Rungrat et al., 2016).  
155 After 30 minutes dark adaptation,  $F_o$  was measured in the dark before  $F_m$  was  
156 measured with an initial saturating pulse in the dark, followed by a series of  
157 saturating pulses 60 seconds apart to monitor  $F_m'$  and  $F'$  during the 8 minutes of  
158 actinic light illumination and following 3 minutes dark relaxation period. NPQ can be  
159 calculated from the ratio of change in  $F_m$  and  $F_m'$  during the illumination as shown in  
160 the equation:

161

$$162 \quad \text{NPQ} = (F_m - F_m')/F_m' \quad \dots\dots\dots (1)$$

163

164 with  $F_m'$  and  $F_m$  being the maximal fluorescence of the light-adapted and dark-  
165 adapted leaf, respectively. In addition to NPQ, dark adapted  $F_v/F_m$  (QY-max) was  
166 measured as an indicator of photoinhibition and light adapted  $F_v'/F_m'$  was the  
167 measure of photosynthetic efficiency under the actinic light.

168

## 169 **Statistical analysis and QTL mapping**

### 170 *Experimental Design*

171 Our goal is to identify quantitative trait loci as associated SNPs underlying  
172 photoprotection traits. In genome wide association studies (dominated by human  
173 genetics) the level of replication is at the level of the SNP, which ideally would be  
174 independent of other loci. Because of both local linkage disequilibrium and  
175 background population structure SNPs are not independent. This is particularly true  
176 with inbred accessions. Fortunately, a large collection of accessions is available  
177 which were selected to be roughly equidistantly related to each other (Platt et al,  
178 2010). Thus, to maximise statistical power for identifying genetic variants underlying  
179 phenotypes, a panel of 284 natural accessions of Arabidopsis was selected from the  
180 HapMap collection for the Late Autumn experiment and an overlapping panel of 223  
181 accessions was selected for the Early Autumn experiment. To maximize the number  
182 of accessions within an experiment, single replicates were grown in each climate  
183 condition. The Col-0 accession was replicated 16 times to allow calculation of  
184 biological variation of the traits.

185

186 For the phenotypic data, three phases of NPQ kinetics were examined. Induction  
187 was determined by NPQ formation when actinic light illumination was initiated,  
188 followed by a steady state phase and lastly, a relaxation phase in the dark (induction:  
189 0 - 120 sec, steady state: 120 - 450 sec, and relaxation phases: 450 - 610 sec, Fig  
190 2). The rate of induction was calculated as average slope of increase in NPQ during  
191 the induction (0 - 120 seconds); the maximum NPQ value was determined as the  
192 maximum value reached throughout the whole experiment and the rate of relaxation  
193 was calculated as the average slope during the dark relaxation (450 - 610 seconds).  
194 As relatively few, equally spaced, time points were sampled during NPQ, fitting  
195 nonlinear induction and relaxation kinetics is unlikely to change the results

196 substantially. This is because the QTL effect is not the kinetics of particular  
197 accession, but the relative difference between summaries of the kinetic paths among  
198 SNP genotypes (Fig1).

199

200 The individual phenotypes for each accession was used for the GWAS separately in  
201 both climate conditions. To determine the GxE interaction, all data was used in a  
202 single GWAS and each SNPs was tested for a main and climate specific effect and  
203 relatedness among accessions was accounted for as a random effect kinship matrix  
204 (Li et al, 2014). SNP data from the 6M SNPs data set (1001 Genomes Consortium,  
205 2016) was filtered for a minor allele frequency <2.5% with a final set of  
206 approximately 1.7 million SNPs. GWAS were performed using the R package  
207 QTLRel (R. Cheng, Abney, Palmer, & Skol, 2011), based on model (2) below, which  
208 incorporated a relationship matrix to correct for confounding population structure.

209

210 
$$y = x + z + u + \epsilon \quad \dots\dots\dots (2)$$

211

212 where  $y = (y_{ij})$  is a vector of the n phenotypic values with  $y_{ij}$  being the j-th accession  
213 in the i-th environment (i.e. one of the two climate conditions within each  
214 experiment),  $x = (x_{ijk})_{n \times (k+1)}$  represents the intercept and k covariates (if any) with  
215 effects  $\beta$ , z is a vector of the coded genotypes at a scanning locus with effect  $\gamma$ ,  $u =$   
216  $(u_1, u_2, \dots, u_n)'$  represents polygenic variation, and  $\epsilon = (\epsilon_1, \epsilon_2, \dots, \epsilon_n)$  the residual  
217 effect. It was assumed that  $u \sim N(0, G\sigma_g^2)$ ,  $\epsilon \sim N(0, I\sigma^2)$  and  $u$  was independent of  $\epsilon$ .  
218 The genetic relationship matrix G was estimated by identify-by-state (IBS) from  
219 genotypic data with markers on the chromosome under scan being excluded to avoid  
220 proximal contamination (Riyan Cheng, Parker, Abney, & Palmer, 2013; Listgarten et



221 al., 2012). A 0.05 genome-wide significance threshold was determined by the  
222 Bonferroni procedure, i.e.,  $2(1-0.05/m,1)$ , where  $m$  is the number of SNPs. This  
223 threshold turned out to be very close to empirical thresholds estimated by the  
224 permutation test.

225

### 226 **Visualisation of alignments between KBS-Mac-74 and Col-0 accessions**

227 Kablammo (Wintersinger & Wasmuth, 2015) was used to obtain a graphical  
228 understanding of the alignments between the *PSBS* genomic regions of the TAIR 10  
229 Col-0 reference genome (Chr1: 16,866,832..16,873,428) and the recently sequenced  
230 KBS-Mac-74 genome (Michael et al., 2018). The sequence for the Col-0 *PSBS*  
231 genomic fragment was downloaded from the 1001 genomes project website and the  
232 KBS-Mac-74 genome was available on the European Nucleotide Archive (1001  
233 Genomes Consortium, 2016; Michael et al., 2018). The KBS-Mac-74 genome was  
234 aligned with the Col-0 genomic fragment using Sequence Server v1.0.9 (Priyam et  
235 al., 2015) and the results were uploaded onto and visualised with Kablammo.

236

### 237 **Alignment of reads to Col-0 and KBS-Mac-74 haplotypes**

238 Paired-end sequence reads for high and low NPQ accessions sequenced as part of  
239 the 1001 Genomes Project (1001 Genomes Consortium, 2016) were downloaded  
240 from NCBI SRA and trimmed for adapter content and low quality bases using  
241 Trimmomatic v0.36 (Bolger, Lohse, & Usadel, 2014) with the following parameters:  
242 LEADING:3 TRAILING:3 SLIDINGWINDOW:4:15 MINLEN:36. Retained paired-end  
243 reads were aligned to the Col-0 and KBS-Mac-74 genomes separately using Bowtie2  
244 local alignment (1 mismatch per seed, maximum of 5 re-seeds; (Langmead &  
245 Salzberg, 2012). Alignment files were sorted and indexed using samtools (H. Li et

246 al., 2009). Read coverage tracks were created for each accession using deepTools  
247 bamCoverage, with the coverage normalized to the number of reads per kilobase per  
248 million mapped reads (Ramirez et al., 2016). Coverage information around the *PSBS*  
249 genomic region was extracted from bedgraph files using bedtools v2.25 (Quinlan &  
250 Hall, 2010).

251

### 252 **Semi-quantification of PsbS protein in high and low NPQ lines**

253 Five accessions with high NPQ and five accessions with low NPQ (Supplemental 6),  
254 as well as the *npq4* mutant and *PSBS* over-expression line, were grown for 6 weeks  
255 in 8 h day/16 h night cycle under 150  $\mu\text{mol photons m}^{-2}\text{s}^{-1}$  light with a temperature  
256 range of 8.6 °C – 18 °C. Mature leaves from 4 – 6 plants were pooled, frozen in  
257 liquid nitrogen, ground to a powder, and total proteins were extracted in 20 mM Tris-  
258 HCL solution (pH 7.8) containing 2 % SDS and protease inhibitor. After incubation at  
259 37 °C and centrifugation, protein concentrations in the supernatants were measured  
260 using the Lowry assay. For each sample, 10  $\mu\text{g}$  total protein were separated on  
261 SDS-PAGE gels containing 15% acrylamide, then transferred to PVDF membranes  
262 and blotted with a polyclonal antibody specific to the PsbS protein (a gift from R.  
263 Barbato). Six replicate Western blots containing all samples were developed and  
264 antibody signal intensities were quantified using an Odyssey CLx Imaging System  
265 (LI-COR). PsbS signals were normalised against a second non-specific protein band  
266 that was equally present in all samples (see Supplemental data). Statistical  
267 significance between the normalised signals was determined by a paired Student's T  
268 test (N=30).

269

## 270 **RESULTS**

271 **Natural variation of NPQ in Arabidopsis accessions in response to different**  
272 **climatic conditions**

273 To determine the characteristics of NPQ in stressful environments, an Arabidopsis  
274 HapMap population of 284 accessions was grown in modified climate chambers  
275 (Brown et al., 2014) programmed to simulate contrasting environments: a “coastal”  
276 environment representing a temperate climate with light intensities similar to  
277 conditions conventionally used to grow Arabidopsis, and an “inland” environment  
278 representing a larger temperature range and higher light intensities (Supplemental  
279 1). Two experiments were run with each condition starting at early- or late-autumn  
280 and transitioning into winter. There were clear differences in growth and  
281 development within the Arabidopsis HapMap population between the two conditions  
282 in both experiments (Fig 1A and B) as plants grown in inland conditions grew smaller  
283 than their coastal counterparts. Due to this variation in growth rate, environmental  
284 effects on NPQ phenotypes were measured when the Col-0 control plants reached a  
285 similar developmental stage (i.e. 14 or 16 leaves) rather than after a predefined  
286 period post-germination.

287

288 The NPQ kinetics of the plants showed variation dependent on their growth  
289 conditions and the developmental stage at which they were measured. When the  
290 samples were measured at the 14-leaf stage, plants grown in inland early-autumn  
291 conditions had a moderately faster NPQ induction relative to plants grown in coastal  
292 conditions by approximately 54%. However, the same plants grown in coastal and  
293 inland late-autumn conditions displayed largely similar NPQ kinetics (Fig 1C and D).  
294 All 14-leaf plants showed a rapid induction of NPQ that lasted approximately 1.5 – 2  
295 minutes after exposure to actinic light ( $700 \mu\text{mol m}^{-2}\text{s}^{-1}$ ), although plants grown in

296 early-autumn conditions reached a maximum NPQ followed by a moderate decline  
297 throughout illumination (Fig 1C). In contrast, NPQ in plants grown in late-autumn  
298 conditions continued to increase during actinic light exposure (Fig 1D). Additionally,  
299 plants grown in late-autumn conditions reached a higher overall NPQ and returned  
300 more rapidly to basal levels during dark incubation following actinic light exposure.

301

302 NPQ kinetic profiles showed a dramatic difference between plants grown in coastal  
303 and inland conditions when measured at the 16-leaf growth stage (Fig 1E and F).  
304 Both groups had a rapid induction of NPQ within approximately 1.5 – 2 minutes of  
305 exposure to actinic light, though plants grown in coastal conditions were slightly  
306 slower to reach a steady phase. After the initial induction of NPQ upon actinic light  
307 exposure, plants grown in inland conditions reached their maximum average NPQ  
308 within 2 minutes, followed by a moderate and steady decrease in NPQ during  
309 illumination. Plants grown in coastal conditions continued to slowly increase during  
310 the same period before reaching their maximum NPQ after 7.5 minutes of  
311 illumination and directly before being transferred into darkness.

312

313 Of the plants grown to the 16-leaf stage, those grown in early-autumn conditions  
314 showed a larger variance in NPQ (Fig 1E – F). Inland plants measured in early-  
315 autumn achieved a maximum average NPQ of 2.47 (s.d. 0.38) after two minutes of  
316 exposure to actinic light, while coastal plants achieved a maximum average NPQ of  
317 2.89 (s.d. 0.39) after five minutes of exposure. Plants measured in late-autumn  
318 conditions showed an overall higher NPQ, as inland plants achieved a maximum  
319 average NPQ of 2.62 (s.d. 0.88) after two minutes exposure to actinic light, while  
320 coastal plants achieved the highest NPQ average of 3.24 (s.d. 0.78) after 7.5

321 minutes of exposure to actinic light. When moved to darkness, the plants from inland  
322 conditions exhibited faster NPQ relaxation than plants grown in coastal conditions.

323

324 Photoprotective mutants *npq1*, lacking VxDE (Niyogi et al., 1998) and *npq4*, lacking  
325 PsbS (X. P. Li et al., 2000) were included as controls in all NPQ measurements. The  
326 mutants exhibited approximately four times lower steady-state NPQ than all wild-type  
327 accessions in both inland and coastal conditions and exhibited almost no NPQ  
328 relaxation (Fig 1C – F).

329

### 330 **Genome-wide association identifies 15 significant QTL for NPQ kinetics**

331 In order to gain a better understanding of the QTL involved in NPQ, a GWAS was  
332 conducted using the R package QTLRel (R. Cheng et al., 2011) and the 6M SNP  
333 marker set (1001 Genomes Consortium, 2016). For mapping, a number of derived  
334 traits were calculated at both the 14- and 16-leaf stages, including the rate of NPQ  
335 induction, the slope of the steady phase, maximum NPQ value, and the rate of NPQ  
336 relaxation (Fig 2). For the late-autumn experiment, six QTL were identified across  
337 the three kinetic parameters of NPQ production, including QTL5-3 for the Genotype x  
338 Environment (GxE) interaction between the two conditions (Table 1, Fig 2H). For the  
339 early-autumn experiment, eight QTL were identified across the three kinetic  
340 parameters of NPQ production, including QTL2-3 and QTL4-1 for the GxE  
341 interaction. Interestingly, none of the NPQ QTL were identified in both experiments  
342 or in any two conditions. Mapping of the photosynthetic traits  $F_v/F_m'$  and QY-max  
343 under all conditions revealed five QTL, including QTL1-4 and QTL2-2 previously  
344 identified as NPQ QTL. The majority (12/15) of QTL were identified at the 16-leaf

345 developmental stage, with only QTL2-2 being identified at both developmental  
346 stages but for different traits.

347

348 These QTL were investigated in the TAIR database (Table 1; Huala et al., 2001), but  
349 a majority were not associated with an obvious candidate gene. QTL1-4 was a  
350 strong QTL identified in the coastal late-autumn condition for the slope of the steady  
351 phase and rate of NPQ relaxation (Fig 2C – D), as well as  $F_v/F_m$  and maximum NPQ  
352 value (Table 1). It was also associated with QY-max in the inland late-autumn  
353 condition where it was slightly below the significance threshold. The SNP with the  
354 highest logarithm of odds (LOD) score for QTL1-4 was located in the promoter of the  
355 candidate gene *photosystem II subunit S* (*PSBS*; AT1G44575; Fig 3).

356

357 **Sequence variation in the *PsbS* promoter indicates differential induction of**  
358 ***PSBS* that may be important in NPQ regulation**

359 To explore a possible relationship between natural variation in the *PSBS* genomic  
360 region and the diversity in NPQ phenotypes, the SNP-corrected sequences of the  
361 ten highest and ten lowest NPQ accessions determined in this experiment were  
362 acquired from the 1001 genomes project (Supplemental 1B; Weigel & Mott, 2009).  
363 Four SNPs were identified in the *PsbS* coding region in a comparison between the  
364 two haplotype groups (low NPQ and high NPQ), although each of these encoded  
365 synonymous amino acid residues (Supplemental 1A). Nevertheless, as these are  
366 SNP-corrected sequences, there may be major insertions or deletions that may not  
367 have been identified.

368

369 To compare the sequences of the high and low NPQ accessions, the raw reads of  
370 the *PSBS* genomic region from the 1001 genomes project were aligned to both the  
371 Col-0 reference genome (TAIR 10) and the recently sequenced KBS-Mac-74  
372 genome (Michael et al., 2018). KBS-Mac-74 was chosen because it was the only  
373 accession available with long-read genomic sequence data and has not been SNP-  
374 corrected. Seven of the ten high NPQ accessions were available in the 1001  
375 genomes project and all seven showed the same pattern of missing sections in the  
376 alignments to the promoter of *PSBS* to the Col-0 reference but aligned well to the  
377 KBS-Mac-74 genome. Similarly, of the eight low NPQ accessions available, all eight  
378 aligned well to the Col-0 reference but had missing sections in the alignment to the  
379 *PSBS* promoter from the KBS-Mac-74 genome (Fig 4A – D). When the Col-0 and  
380 KBS-Mac-74 genomes were aligned at this region there were two sections in the  
381 promoter of *PSBS* that did not align. One section was 1,251 bp in Col-0  
382 corresponding with 691 bp in KBS-Mac-74, and the other was 100 bp in Col-0  
383 corresponding with 3,000 bp in KBS-Mac-74 (Fig 4E).

384

385 To determine if there was a difference in PsbS protein abundance between high and  
386 low NPQ accessions, PsbS protein was quantified by Western blotting. Five plants  
387 representative of each NPQ haplotype were grown for six weeks under coastal late-  
388 autumn conditions. A small but highly significant difference in PsbS abundance  
389 between the two haplotype groups was identified (Fig 4F), with the high NPQ  
390 haplotype plants producing ~30% higher amounts of PsbS on average.

391

392 **DISCUSSION**

393 In this study, climate chambers were used to investigate the effect of local seasonal  
394 growing conditions on the non-photochemical quenching (NPQ) pathway. A genome-  
395 wide association study (GWAS) was used to investigate the genetic architecture of  
396 NPQ and determine what quantitative trait loci (QTL) are involved in this  
397 physiological process, as it is important for high light tolerance.

398

399 It was clear that different climate conditions affected growth, as plants grown in  
400 coastal conditions grew larger than their inland cohort. The inland environment was  
401 programmed to provide higher light intensities and lower temperatures than the  
402 coastal environment, so NPQ would be more active in plants grown in inland  
403 conditions. Leaf expansion is inversely correlated with light intensity (Potter, Rood, &  
404 Zanewich, 1999) and content of the plant hormone gibberellic acid, which may  
405 underlie why plants grown in high-light environments are physically smaller  
406 (Reviewed in Hedden & Sponsel, 2015; Stowe & Yamaki, 1957).

407

408 The NPQ kinetic profiles of the plants in this study were found to be influenced by  
409 development and climate conditions. When grown to the 14-leaf stage, there was  
410 little difference in the NPQ kinetic profiles between plants grown in either inland or  
411 coastal climates. However, their NPQ profiles changed dramatically when grown to  
412 the 16-leaf stage. Despite these changes, there were some commonalities. For  
413 example, plants grown in inland conditions had consistently faster induction of NPQ  
414 when exposed to actinic light, which suggests the relatively more stressful growing  
415 environment has primed these plants to more rapidly respond to stressful conditions.  
416 Furthermore, all plants in all conditions rapidly resolved their NPQ when moved to  
417 darkness, though inland-grown 16-leaf plants did so more quickly. The steady



418 decrease in NPQ observed in the inland-grown 16-leaf plants during their exposure  
419 to actinic light also suggests they are better acclimated to utilise abiotic stress  
420 response pathways. Differences in glutathione content between inland- and coastal-  
421 grown plants may be a potential mechanism for this observation as glutathione is a  
422 potent antioxidant that fluctuates with light intensity (Alsharafa et al., 2014).  
423 However, more research must be done to confirm this. The differences in NPQ  
424 kinetic profiles between plants grown under field-simulating high- and low-light  
425 environments demonstrates how dynamic environments can condition plants to  
426 develop appropriate physiological adaptations. Genetic variation in this response  
427 may underlie such adaptations to the particular light environments where the plants  
428 were collected.

429

430 To determine the genetic architecture of NPQ, a GWAS was performed and a total of  
431 15 QTL were found to be involved in different components of NPQ (Table 1). They  
432 were detected across different developmental stages and different seasonal climatic  
433 conditions. The majority were found in the 16-leaf stage, further implying the  
434 relevance of plant development in local seasonal climates on NPQ efficiency.  
435 Arabidopsis has a wide geographic distribution and each accession would  
436 experience different conditions in their native environments. This variation was  
437 revealed through QTL that varied between the two simulated environments. All 15  
438 QTL identified were associated with multiple candidate genes (Supplemental 7). For  
439 example, QTL1-5 may be associated with *NDF5*, a gene involved in regulation of  
440 gene expression and electron transport in photosystem I (Ishida et al., 2009). QTL5-  
441 2 may be associated with *PTST*, which encodes a chloroplast-localised protein that  
442 is involved in protein translocation (Lohmeier-Vogel et al., 2008).

443

444 QTL1-4 is the most prominent QTL identified in this study and is associated with  
445 *PSBS*, a gene known to be involved with NPQ (X. P. Li et al., 2000). The exact role  
446 of the PsbS protein in the NPQ pathway is currently unclear. It has been found to  
447 bind to chlorophylls and xanthophylls, making it the possible site of xanthophyll-  
448 dependent NPQ (X. P. Li et al., 2000). PsbS has also been found to induce  
449 conformational changes in the antennae of photosystem II (Horton, Wentworth, &  
450 Ruban, 2005). Regardless, PsbS is known to be a requirement because *npq4* is a  
451 PsbS loss-of-function mutant and consequently shows little to no NPQ activity (X. P.  
452 Li et al., 2000).

453

454 This study also found evidence for a correlation between NPQ competency and the  
455 *PSBS* genomic architecture. Gene alignments were performed for the highest and  
456 lowest NPQ accessions, with TAIR 10 Col-0 and KBS-Mac-74 (Michael et al., 2018)  
457 being the models for low and high NPQ accessions, respectively (Fig 4). These  
458 alignments show little variation within the protein-coding regions of *PSBS*, which  
459 ultimately have no impact on protein function since they do not alter the amino acid  
460 sequence. Alignments of the *PSBS* genomic regions from high and low NPQ  
461 accessions show structural variation within the promoter elements of the *PSBS*  
462 gene. The non-homologous elements may be due to a deletion, transposition, and/or  
463 a gene conversion event. There did not appear to be any obvious regulatory  
464 elements within those promoter regions, though more experimentation and functional  
465 tests would be required to determine their precise effect on PsbS expression and  
466 NPQ. Regardless, there does appear to be a significant influence on PsbS protein

467 expression as high NPQ accessions have a relatively higher level of leaf PsbS  
468 protein content when grown in coastal late-autumn conditions (Fig 4F).

469

470 Besides genotypic and phenotypic variations in NPQ, there are also several  
471 instances of genotype-by-environment (GxE) interaction, mostly in NPQ induction.

472 As previously mentioned, this may be due to plants grown in high-light environments

473 being better conditioned to respond to light stress. QTL2-3 and QTL5-3 are both

474 identified to have GxE variation in NPQ induction, but neither are associated with

475 obvious candidate genes that may be directly or indirectly involved in NPQ.

476 Nevertheless, a previous GWAS investigating the effects of climate on flowering time

477 identified genes that would not have obviously been attributed to that pathway

478 (Tabas-Madrid et al., 2018). A similar situation may be apparent in this study, but

479 more research is required.

480

481 NPQ is an extremely important physiological pathway that allows plants to adapt to

482 fluctuating lighting conditions and is therefore strongly influenced by the local

483 environment. Examples of adaptations that result from such environmental pressures

484 include the apparent increased reliance on the mechanism of the PsbS protein. This

485 study has also shown there are several genetic components to NPQ identified by

486 GWAS across simulated environments. Furthermore, there is evidence for a

487 significant genomic event that directly impacts PsbS expression and subsequently

488 impacts NPQ competence. In the face of current global climate challenges, better

489 understanding of the NPQ pathway could have important implications for agriculture

490 (Kromdijk et al., 2016) and may help better implement genomics-based strategies for

491 food security and conservation efforts.

492

## 493 **ACKNOWLEDGEMENTS**

494 This work was supported by grants from the ARC centre of excellence in Plant  
495 Energy Biology and the Australian National University for TR, AA, RC, PW, JO and  
496 BP and also for providing publication cost. The Australian Plant Phenomics Facility is  
497 supported under the National Collaborative Research Infrastructure Strategy of the  
498 Australian Government. TS is supported by the Jean Rogerson Postgraduate  
499 Scholarship. PG and E-MA acknowledge support from Academy of Finland projects  
500 26080341, 307335 and 303757.

501

## 502 **FIGURES**

503 **Table 1.** Plants were grown in climatic growth chambers programmed to simulate the  
504 daily temperature ranges for late- and early-autumn conditions historically found in  
505 Australian coastal and inland environments. Temperature ranges gradually changed  
506 over time during the course of the experiments.

507

508 **Table 2.** Fifteen QTL were identified for NPQ and other photosynthetic traits across  
509 four conditions and two developmental stages. The component of NPQ found to be  
510 associated with the specified QTL are listed under the conditions they were identified  
511 (colour-coded for convenience). G x E – genotype-by-environment interaction; <sup>e</sup>  
512 analysis results at 14-leaf stage; <sup>f</sup> analysis results at 16-leaf stage

513

514 **Figure 1:** Natural variation of growth in response to different environmental  
515 conditions of 284 *Arabidopsis* accessions and 2 photoprotective mutants (*npq1*,  
516 *npq4*) within coastal (A) and inland (B) conditions. In this experiment, plants were

517 measured for NPQ when Col-0 control plants (red boxes) reached the 16-leaf stage  
518 in both growth conditions to minimise developmental effects. (C – F) NPQ kinetic  
519 profiles of 14-leaf plants grown in early (C) and late (D) autumn conditions and 16-  
520 leaf plants grown in early (E) and late (F) autumn conditions.

521

522 **Figure 2:** (A) NPQ kinetics profile of 16-leaf plants grown in late autumn conditions  
523 highlighting the key components of NPQ that were the focus of GWAS analysis. (B-  
524 J) Results of GWAS performed during the three stages of NPQ defined in (A) on  
525 plants grown in coastal late-autumn (B-D) and inland late-autumn (E-G) conditions,  
526 as well as Gene x Environment interactions (H-J) with the most significant SNPs  
527 highlighted. The dotted lines indicate the Bonferroni threshold of significance.

528

529 **Figure 3:** Association of SNPs in the region of QTL1-4, a QTL found to be significant  
530 during both the NPQ steady and relaxation phases for plants grown in coastal late-  
531 autumn conditions. The more significant SNPs are concentrated within the promoter  
532 region of the *PSBS* gene (AT1G44575). The black dotted lines indicate the  
533 Bonferroni threshold of significance.

534

535 **Figure 4:** (A-D) Coverage tracks of the *PSBS* genomic regions from five low NPQ (A  
536 and B) and five high NPQ (C and D) Arabidopsis accessions aligned with the TAIR  
537 10 Col-0 reference genome (low NPQ accession; A and C) and KBS-Mac-74  
538 genome (high NPQ accession; B and D). Values along x-axes indicate the base pair  
539 distance relative to the *PSBS* transcription start site. Genes along the track are  
540 coloured green and the intergenic region is coloured pink. (E) Graphical view of the  
541 alignment of the TAIR 10 Col-0 and the KBS-Mac-74 *PSBS* genomic regions. Axis

542 values refer to base pair positions within the respective tracks. (F) Comparison of the  
543 average relative PsbS protein abundance between low and high NPQ accessions.  
544 Error bars represent standard deviations. N=30; \*\*\* P < 0.001 with paired Student's  
545 T test.

546

## 547 REFERENCES

- 548 Alsharafa, K., Vogel, M. O., Oelze, M.-L., Moore, M., Stingl, N., König, K., . . . Dietz,  
549 K.-J. (2014). Kinetics of retrograde signalling initiation in the high light  
550 response of *Arabidopsis thaliana*. *Phil. Trans. R. Soc. B*, 369(1640),  
551 20130424.
- 552 Bolger, A. M., Lohse, M., & Usadel, B. (2014). Trimmomatic: a flexible trimmer for  
553 Illumina sequence data. *Bioinformatics*, 30(15), 2114-2120.  
554 doi:10.1093/bioinformatics/btu170
- 555 Bölter, B., Seiler, F., Soll, J. (2018). Analysis of *Arabidopsis thaliana* Growth  
556 Behavior in Different Light Qualities. *J. Vis. Exp.* (132), e57152,  
557 doi:10.3791/57152.
- 558 Briantais, J. M., Vernotte, C., Picaud, M., & Krause, G. H. (1979). Quantitative Study  
559 of the Slow Decline of Chlorophyll Alpha-Fluorescence in Isolated-  
560 Chloroplasts. *Biochimica Et Biophysica Acta*, 548(1), 128-138. doi:Doi  
561 10.1016/0005-2728(79)90193-2
- 562 Brown, T. B., Cheng, R. Y., Sirault, X. R. R., Rungrat, T., Murray, K. D., Trtilek, M., . .  
563 . Borevitz, J. O. (2014). TraitCapture: genomic and environment modelling of  
564 plant phenomic data. *Current Opinion in Plant Biology*, 18, 73-79.  
565 doi:10.1016/j.pbi.2014.02.002

- 566 Cheng, R., Abney, M., Palmer, A. A., & Skol, A. D. (2011). QTLRel: an R Package  
567 for Genome-wide Association Studies in which Relatedness is a Concern.  
568 *Bmc Genetics*, 12. doi:10.1186/1471-2156-12-66
- 569 Cheng, R., Parker, C. C., Abney, M., & Palmer, A. A. (2013). Practical considerations  
570 regarding the use of genotype and pedigree data to model relatedness in the  
571 context of genome-wide association studies. *G3: Genes, Genomes, Genetics*,  
572 g3. 113.007948.
- 573 1001 Genomes Consortium (2016). 1,135 Genomes Reveal the Global Pattern of  
574 Polymorphism in *Arabidopsis thaliana*. *Cell*, 166(2), 481-491.  
575 doi:10.1016/j.cell.2016.05.063
- 576 Correa-Galvis, V., Poschmann, G., Melzer, M., Stuhler, K., & Jahns, P. (2016). PsbS  
577 interactions involved in the activation of energy dissipation in *Arabidopsis*.  
578 *Nature Plants*, 2(2). doi:10.1038/Nplants.2015.225
- 579 Demmig-Adams, B., & Adams, W. W. (1992). Photoprotection and Other Responses  
580 of Plants to High Light Stress. *Annual Review of Plant Physiology and Plant*  
581 *Molecular Biology*, 43, 599-626. doi:DOI  
582 10.1146/annurev.pp.43.060192.003123
- 583 Hedden, P., & Sponsel, V. (2015). A century of gibberellin research. *Journal of plant*  
584 *growth regulation*, 34(4), 740-760.
- 585 Herritt, M., Dhanapal, A. P., & Fritschi, F. B. (2016). Identification of Genomic Loci  
586 Associated with the Photochemical Reflectance Index by Genome-Wide  
587 Association Study in Soybean. *Plant Genome*, 9(2).  
588 doi:10.3835/plantgenome2015.08.0072

- 589 Horton, P., Wentworth, M., & Ruban, A. (2005). Control of the light harvesting  
590 function of chloroplast membranes: The LHCII-aggregation model for non-  
591 photochemical quenching. *Febs Letters*, 579(20), 4201-4206.
- 592 Huala, E., Dickerman, A. W., Garcia-Hernandez, M., Weems, D., Reiser, L., LaFond,  
593 F., . . . Huang, W. (2001). The Arabidopsis Information Resource (TAIR): a  
594 comprehensive database and web-based information retrieval, analysis, and  
595 visualization system for a model plant. *Nucleic Acids Research*, 29(1), 102-  
596 105.
- 597 Ishida, S., Takabayashi, A., Ishikawa, N., Hano, Y., Endo, T., & Sato, F. (2009). A  
598 novel nuclear-encoded protein, NDH-dependent cyclic electron flow 5, is  
599 essential for the accumulation of chloroplast NAD (P) H dehydrogenase  
600 complexes. *Plant and cell physiology*, 50(2), 383-393.
- 601 Jahns, P., & Holzwarth, A. R. (2012). The role of the xanthophyll cycle and of lutein  
602 in photoprotection of photosystem II. *Biochimica et Biophysica Acta (BBA)-*  
603 *Bioenergetics*, 1817(1), 182-193.
- 604 Jung, H. S., & Niyogi, K. K. (2009). Quantitative Genetic Analysis of Thermal  
605 Dissipation in Arabidopsis. *Plant Physiology*, 150(2), 977-986.  
606 doi:10.1104/pp.109.137828
- 607 Kromdijk, J., Glowacka, K., Leonelli, L., Gabilly, S. T., Iwai, M., Niyogi, K. K., & Long,  
608 S. P. (2016). Improving photosynthesis and crop productivity by accelerating  
609 recovery from photoprotection. *Science*, 354(6314), 857-861.  
610 doi:10.1126/science.aai8878
- 611 Langmead, B., & Salzberg, S. L. (2012). Fast gapped-read alignment with Bowtie 2.  
612 *Nature Methods*, 9(4), 357-U354. doi:10.1038/Nmeth.1923



- 613 Li, Y., Cheng, R., Spokas, K.A., Palmer, A.A., & Borevitz, J.O. (2014). Genetic  
614 Variation for Life History Sensitivity to Seasonal Warming in *Arabidopsis*  
615 *thaliana*. *Genetics*, 196(2): 569-577
- 616 Li, H., Handsaker, B., Wysoker, A., Fennell, T., Ruan, J., Homer, N., . . . Proc, G. P.  
617 D. (2009). The Sequence Alignment/Map format and SAMtools.  
618 *Bioinformatics*, 25(16), 2078-2079. doi:10.1093/bioinformatics/btp352
- 619 Li, X. P., Bjorkman, O., Shih, C., Grossman, A. R., Rosenquist, M., Jansson, S., &  
620 Niyogi, K. K. (2000). A pigment-binding protein essential for regulation of  
621 photosynthetic light harvesting. *Nature*, 403(6768), 391-395. doi:Doi  
622 10.1038/35000131
- 623 Li, X. P., Gilmore, A. M., Caffarri, S., Bassi, R., Golan, T., Kramer, D., & Niyogi, K. K.  
624 (2004). Regulation of photosynthetic light harvesting involves intrathylakoid  
625 lumen pH sensing by the PsbS protein. *Journal of Biological Chemistry*,  
626 279(22), 22866-22874. doi:10.1074/jbc.M402461200
- 627 Li, Y., Huang, Y., Bergelson, J., Nordborg, M., & Borevitz, J. O. (2010). Association  
628 mapping of local climate-sensitive quantitative trait loci in *Arabidopsis*  
629 *thaliana*. *Proceedings of the National Academy of Sciences of the United*  
630 *States of America*, 107(49), 21199-21204. doi:10.1073/pnas.1007431107
- 631 Listgarten, J., Lippert, C., Kadie, C. M., Davidson, R. I., Eskin, E., & Heckerman, D.  
632 (2012). Improved linear mixed models for genome-wide association studies.  
633 *Nature Methods*, 9(6), 525.
- 634 Lohmeier-Vogel, E. M., Kerk, D., Nimick, M., Wrobel, S., Vickerman, L., Muench, D.  
635 G., & Moorhead, G. B. (2008). *Arabidopsis* At5g39790 encodes a chloroplast-  
636 localized, carbohydrate-binding, coiled-coil domain-containing putative  
637 scaffold protein. *BMC Plant Biology*, 8(1), 120.

638 Michael, T. P., Jupe, F., Bemm, F., Motley, S. T., Sandoval, J. P., Lanz, C., . . .  
639 Ecker, J. R. (2018). High contiguity *Arabidopsis thaliana* genome assembly  
640 with a single nanopore flow cell. *Nature communications*, *9*(1), 541.

641 Niyogi, K. K., Grossman, A. R., & Bjorkman, O. (1998). *Arabidopsis* mutants define a  
642 central role for the xanthophyll cycle in the regulation of photosynthetic energy  
643 conversion. *Plant Cell*, *10*(7), 1121-1134. doi:DOI 10.1105/tpc.10.7.1121

644 Potter, T. I., Rood, S. B., & Zanewich, K. P. (1999). Light intensity, gibberellin  
645 content and the resolution of shoot growth in *Brassica*. *Planta*, *207*(4), 505-  
646 511.

647 Priyam, A., Woodcroft, B. J., Rai, V., Munagala, A., Moghul, I., Ter, F., . . . Rumpf,  
648 W. (2015). Sequenceserver: a modern graphical user interface for custom  
649 BLAST databases. *bioRxiv*, 033142.

650 Quinlan, A. R., & Hall, I. M. (2010). BEDTools: a flexible suite of utilities for  
651 comparing genomic features. *Bioinformatics*, *26*(6), 841-842.  
652 doi:10.1093/bioinformatics/btq033

653 Ramirez, F., Ryan, D. P., Gruning, B., Bhardwaj, V., Kilpert, F., Richter, A. S., . . .  
654 Manke, T. (2016). deepTools2: a next generation web server for deep-  
655 sequencing data analysis. *Nucleic Acids Research*, *44*(W1), W160-W165.  
656 doi:10.1093/nar/gkw257

657 Rousseau, C., Belin, E., Bove, E., Rousseau, D., Fabre, F., Berruyer, R., . . .  
658 Boureau, T. (2013). High throughput quantitative phenotyping of plant  
659 resistance using chlorophyll fluorescence image analysis. *Plant Methods*,  
660 *9*(1), 17.

- 661 Ruban, A. V. (2016). Nonphotochemical Chlorophyll Fluorescence Quenching:  
662 Mechanism and Effectiveness in Protecting Plants from Photodamage. *Plant*  
663 *Physiology*, 170(4), 1903-1916. doi:10.1104/pp.15.01935
- 664 Rungrat, T., Awlia, M., Brown, T., Cheng, R., Sirault, X., Fajkus, J., . . . Tester, M.  
665 (2016). Using phenomic analysis of photosynthetic function for abiotic stress  
666 response gene discovery. *The Arabidopsis Book*, e0185.
- 667 Spokas, K., & Forcella, F. (2006). Estimating hourly incoming solar radiation from  
668 limited meteorological data. *Weed Science*, 54(1), 182-189. doi:Doi  
669 10.1614/Ws-05-098r.1
- 670 Stowe, B. B., & Yamaki, T. (1957). The history and physiological action of the  
671 gibberellins. *Annual review of plant physiology*, 8(1), 181-216.
- 672 Tabas-Madrid, D., Méndez-Vigo, B., Arteaga, N., Marcer, A., Pascual-Montano, A.,  
673 Weigel, D., . . . Alonso-Blanco, C. (2018). Genome-wide signatures of  
674 flowering adaptation to climate temperature: Regional analyses in a highly  
675 diverse native range of *Arabidopsis thaliana*. *Plant, cell & environment*.
- 676 van Rooijen, R., Aarts, M. G., & Harbinson, J. (2015). Natural genetic variation for  
677 acclimation of photosynthetic light use efficiency to growth irradiance in  
678 *Arabidopsis*. *Plant Physiology*, 167(4), 1412-1429.
- 679 Wang, Q. X., Zhao, H., Jiang, J. P., Xu, J. Y., Xie, W. B., Fu, X. K., . . . Wang, G. W.  
680 (2017). Genetic Architecture of Natural Variation in Rice Nonphotochemical  
681 Quenching Capacity Revealed by Genome-Wide Association Study. *Frontiers*  
682 *in Plant Science*, 8. doi:10.3389/fpls.2017.01773
- 683 Weigel, D., & Mott, R. (2009). The 1001 genomes project for *Arabidopsis thaliana*.  
684 *Genome biology*, 10(5), 107.

- 685 Wintersinger, J. A., & Wasmuth, J. D. (2015). Kablammo: an interactive, web-based  
686 BLAST results visualizer. *Bioinformatics*, 31(8), 1305-1306.  
687 doi:10.1093/bioinformatics/btu808
- 688 Zhang, X., Hause, R. J., & Borevitz, J. O. (2012). Natural Genetic Variation for  
689 Growth and Development Revealed by High-Throughput Phenotyping in  
690 *Arabidopsis thaliana*. *G3-Genes Genomes Genetics*, 2(1), 29-34.  
691 doi:10.1534/g3.111.001487

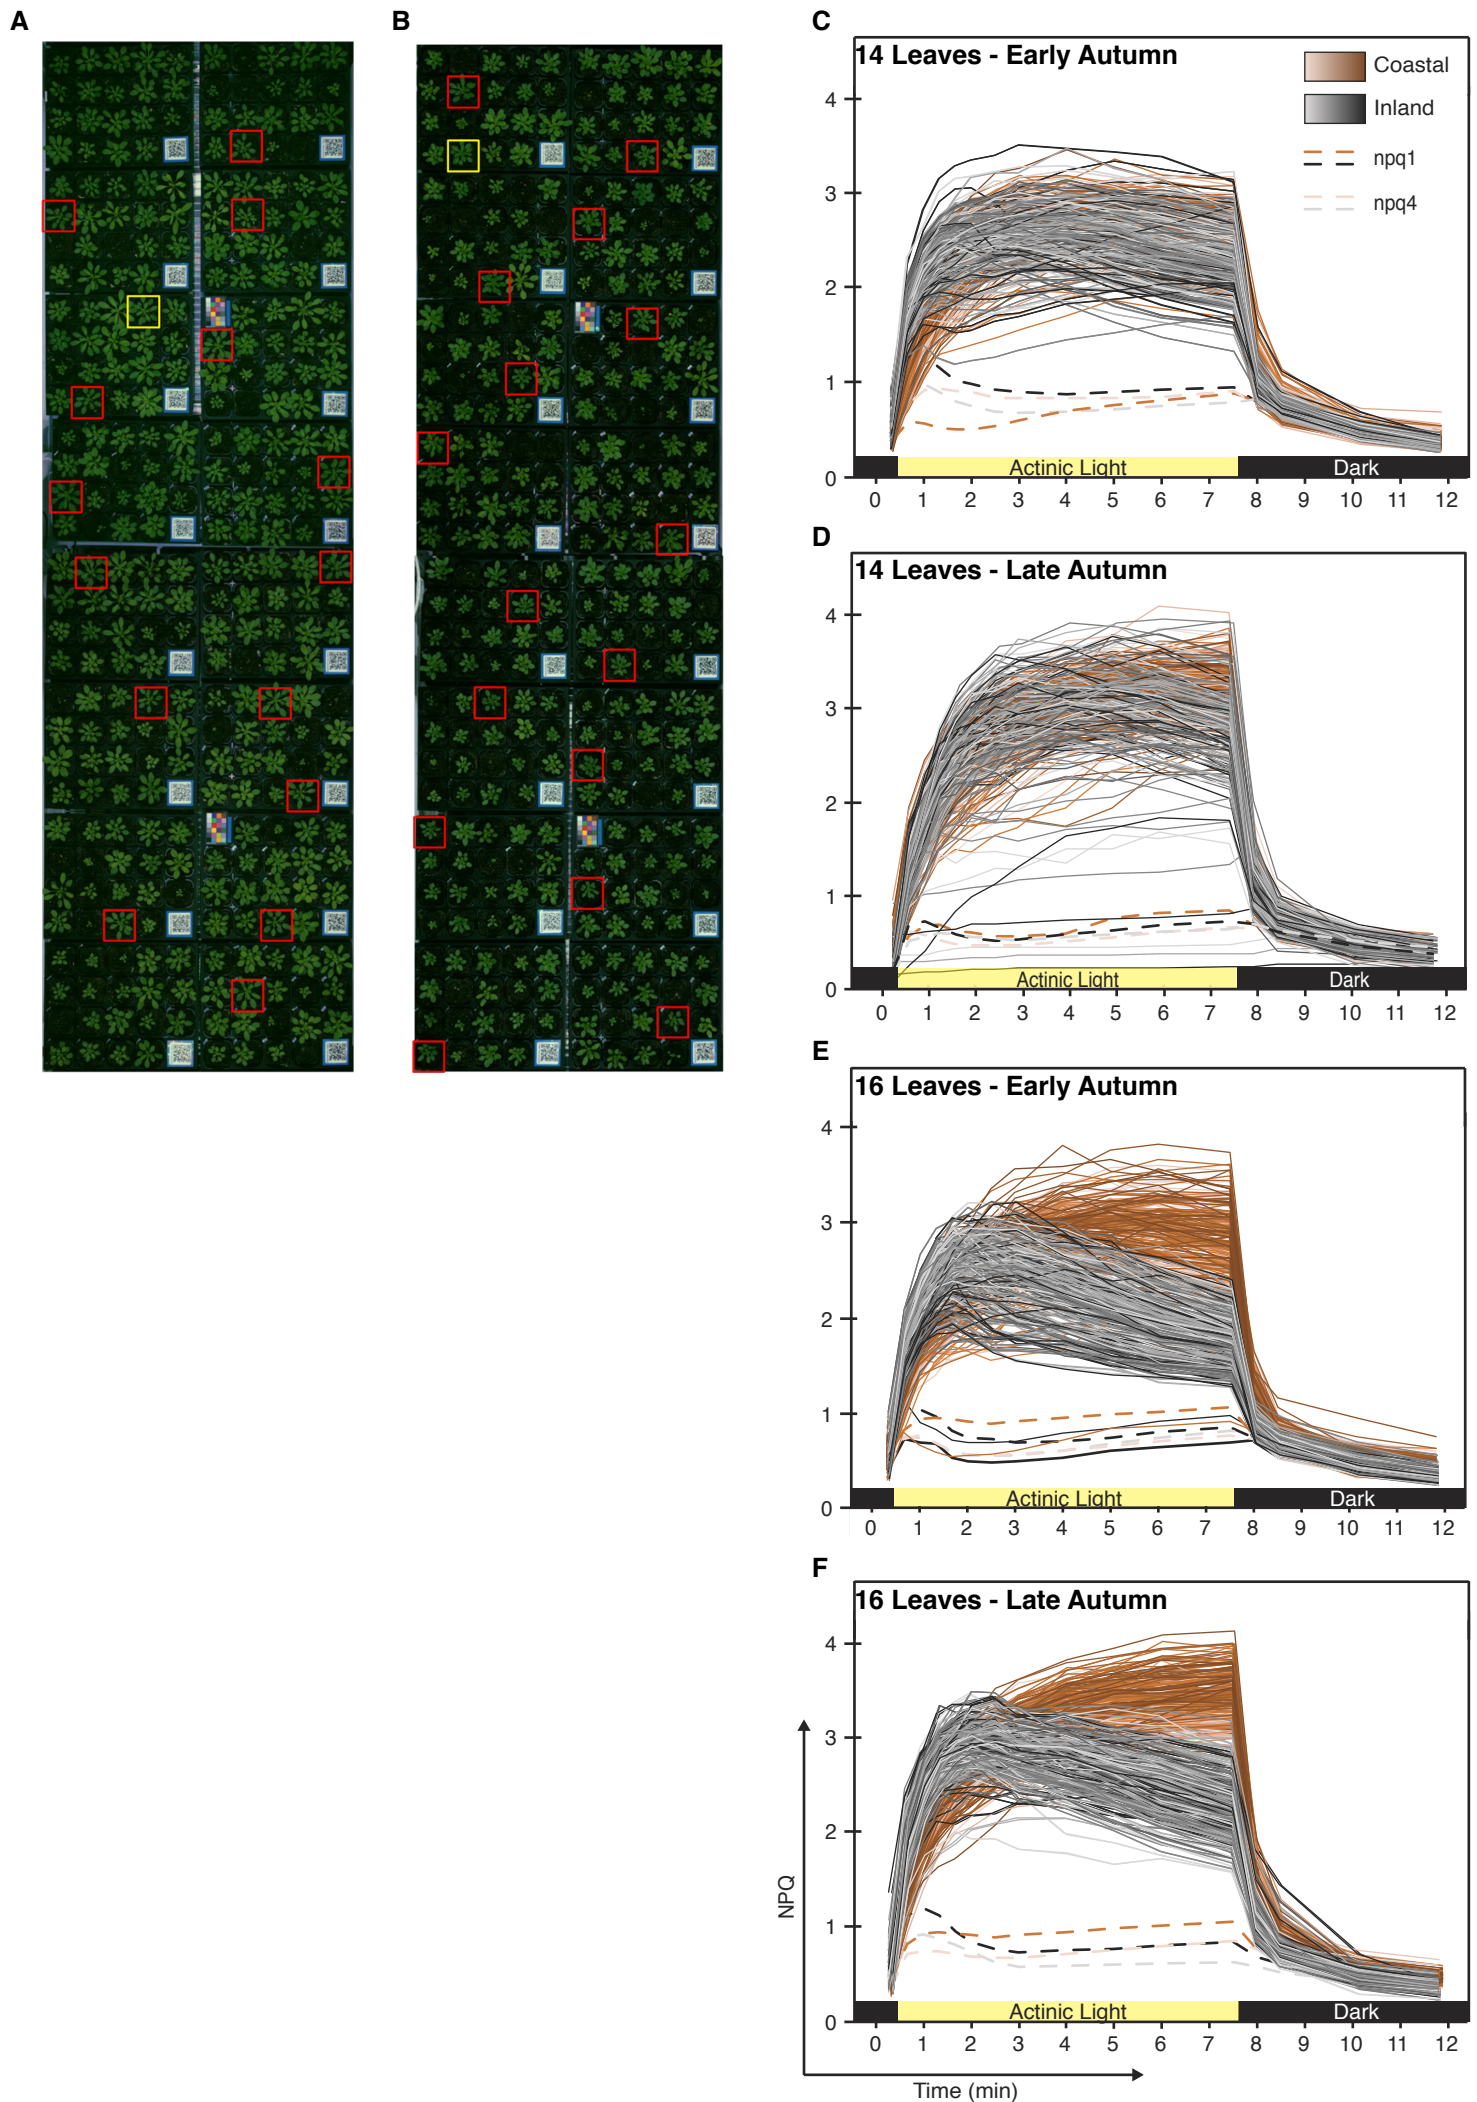

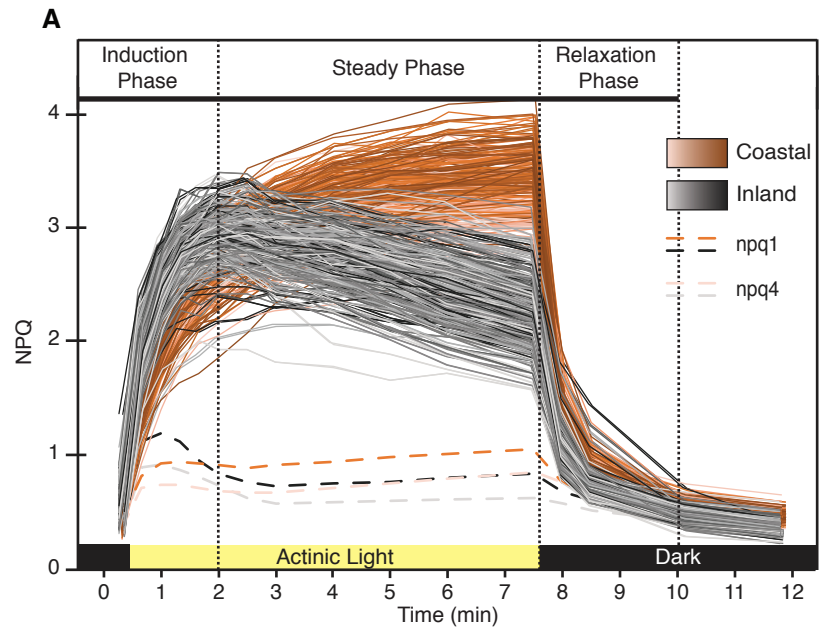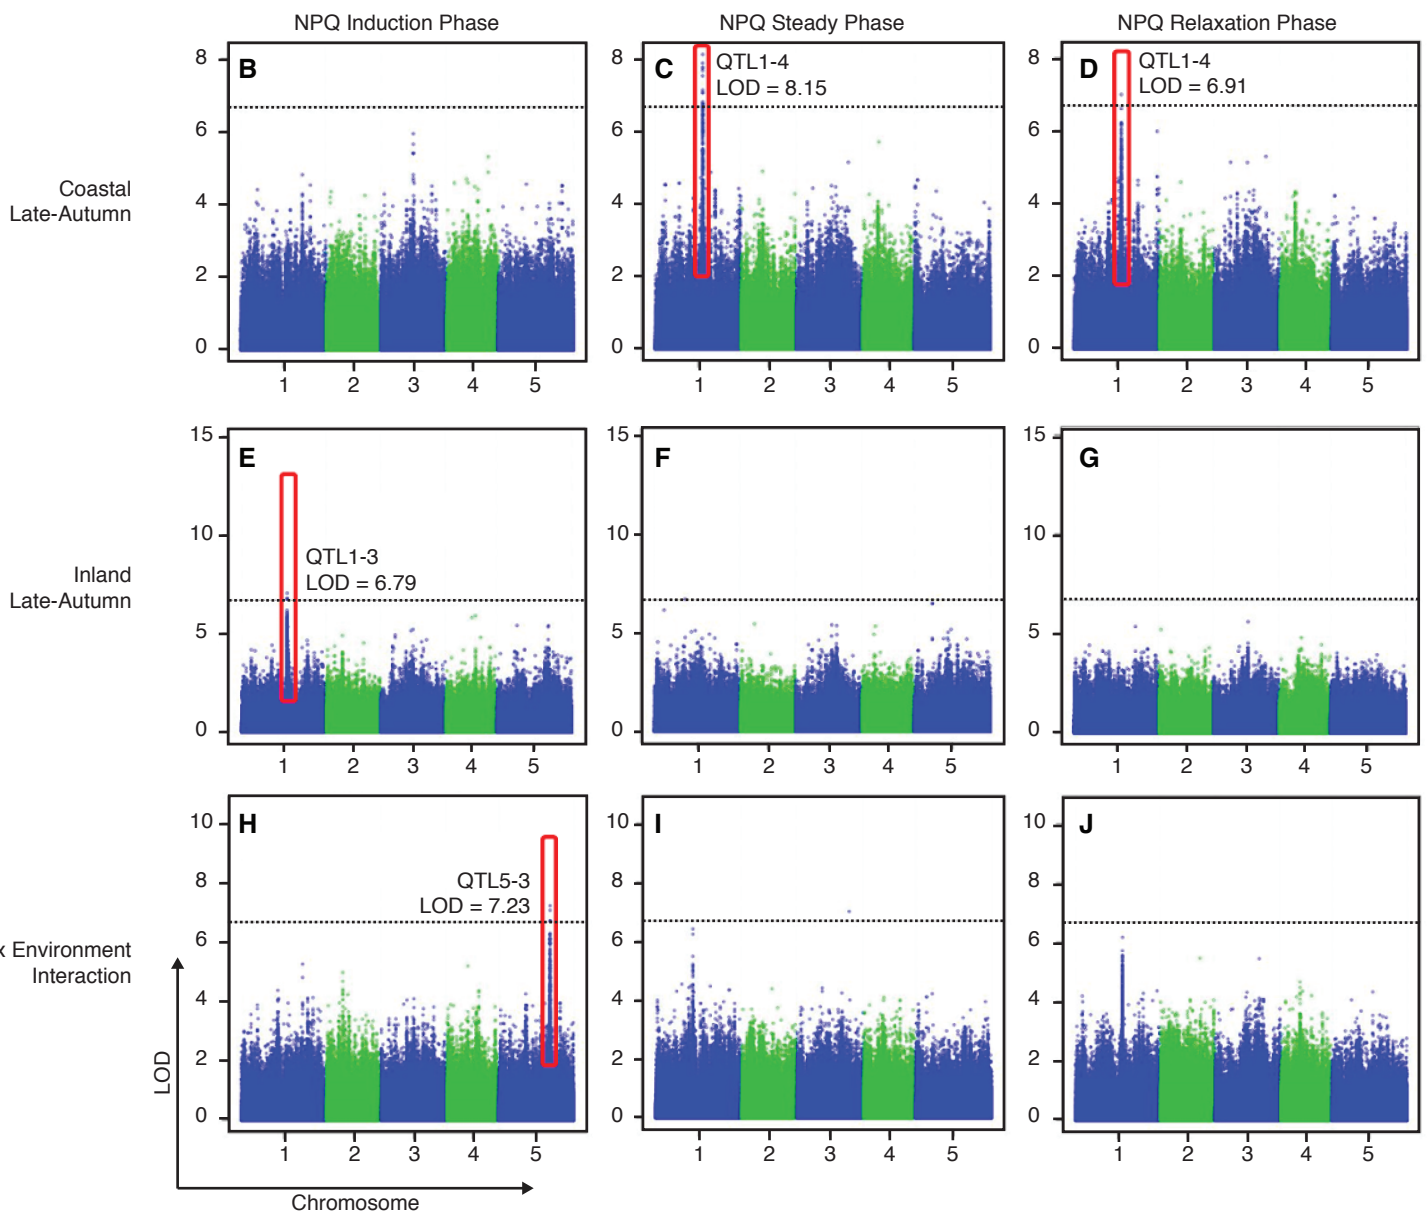

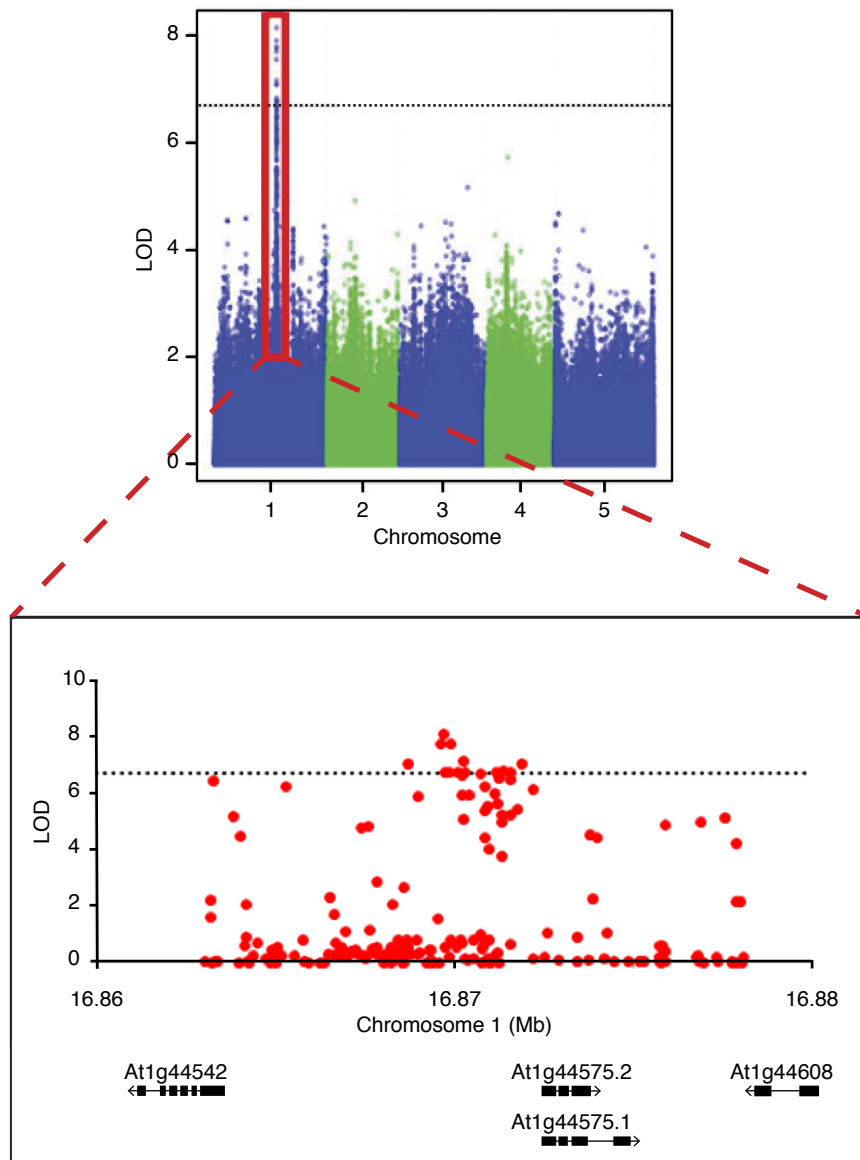

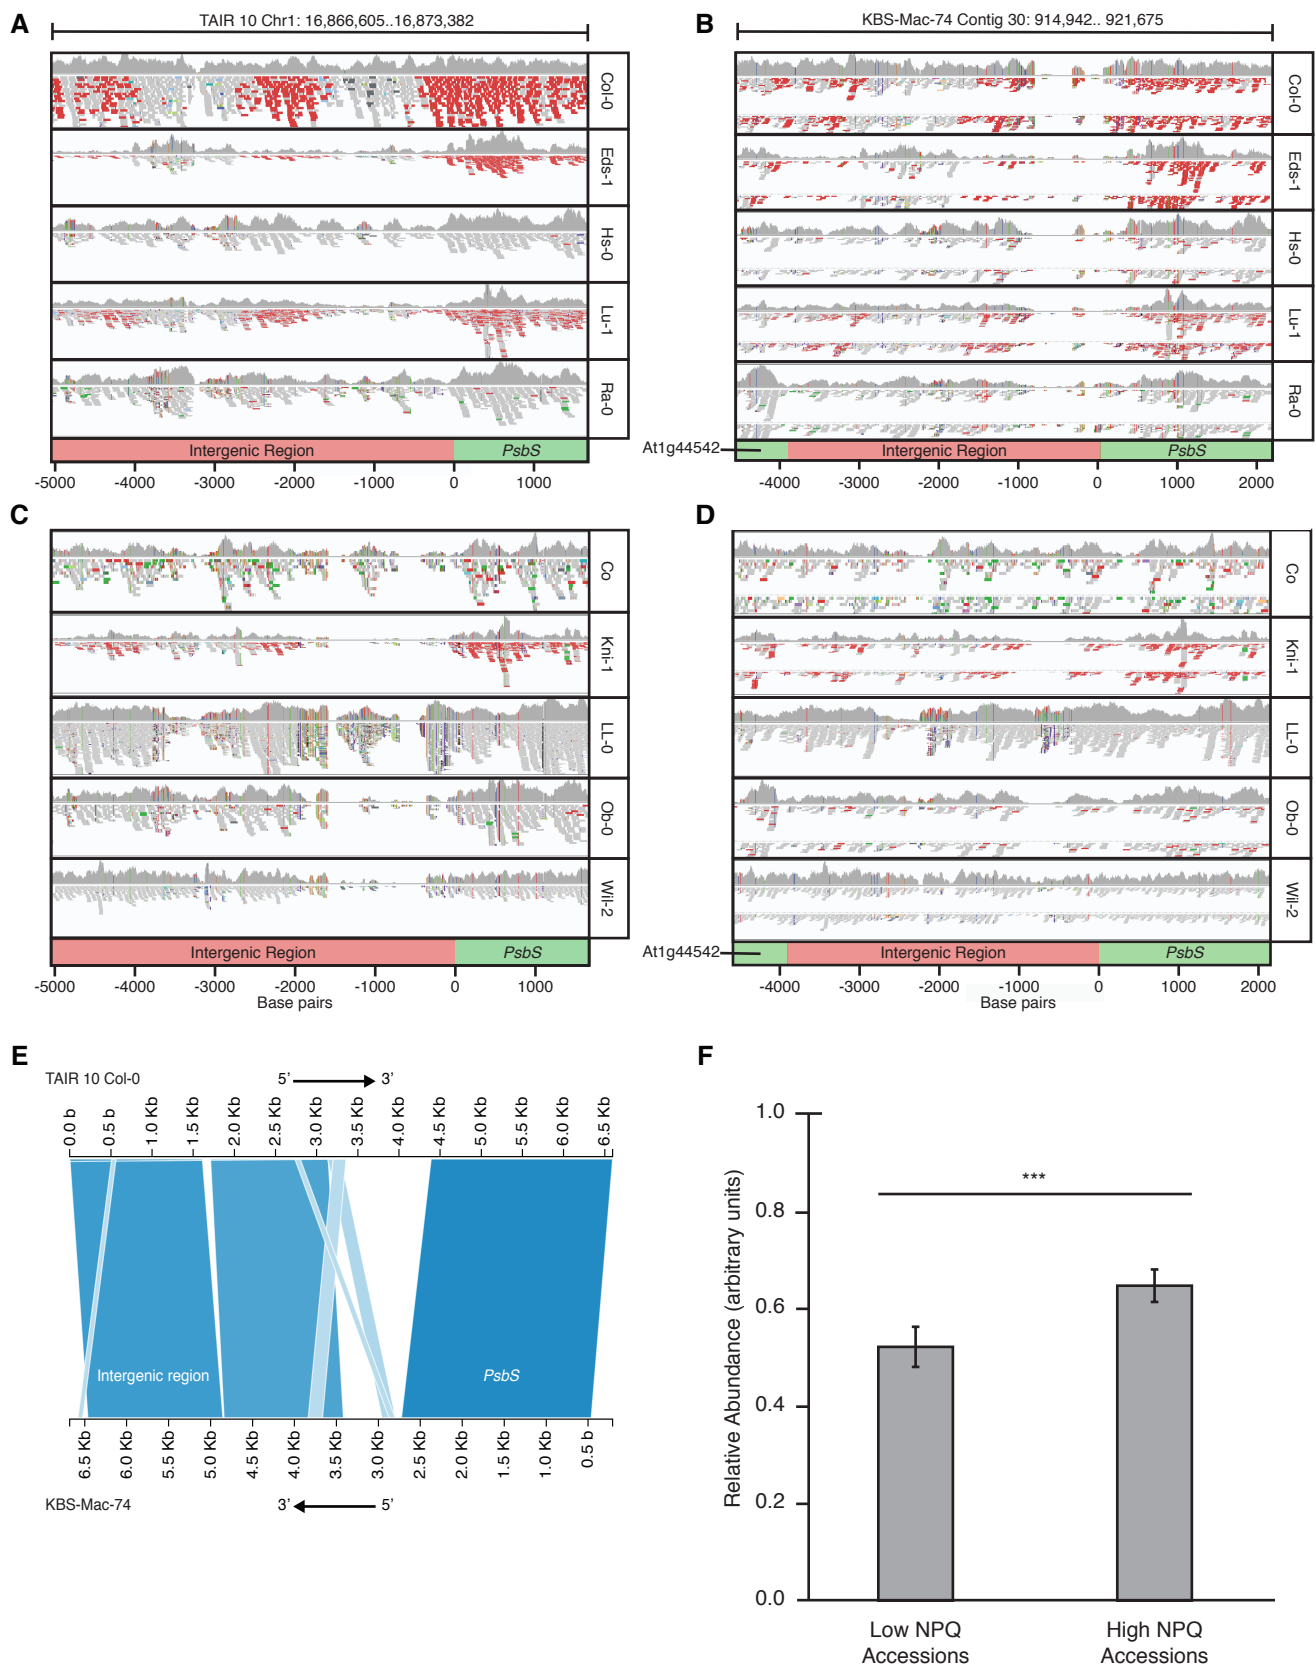



| Environment | Maximum light intensity at noon ( $\mu\text{mol m}^{-2} \text{s}^{-1}$ ) | Simulated seasons and dates             | Temperature range |           |
|-------------|--------------------------------------------------------------------------|-----------------------------------------|-------------------|-----------|
|             |                                                                          |                                         | Beginning         | End       |
| Coastal     | 150                                                                      | Early Autumn   15 Mar 2015 - 7 May 2015 | 14 - 24°C         | 10 - 20°C |
|             |                                                                          | Late Autumn   1 Apr 2014 - 5 Jun 2014   | 13 - 23°C         | 5 - 14°C  |
| Inland      | 300                                                                      | Early Autumn   15 Mar 2015 - 7 May 2015 | 11 - 24°C         | 6 - 18°C  |
|             |                                                                          | Late Autumn   1 Apr 2014 - 5 Jun 2014   | 10 - 23°C         | 5 - 14°C  |

| QTL    | Chr | Position (bp) | LOD score | Col-0 allele Frequency | % variation explained | Trait appearance                  |                                  |                                  |                         |                                  |                                  |
|--------|-----|---------------|-----------|------------------------|-----------------------|-----------------------------------|----------------------------------|----------------------------------|-------------------------|----------------------------------|----------------------------------|
|        |     |               |           |                        |                       | Late Autumn                       |                                  |                                  | Early Autumn            |                                  |                                  |
|        |     |               |           |                        |                       | Coastal                           | Inland                           | G x E                            | Coastal                 | Inland                           | G x E                            |
| QTL1-1 | 1   | 349 233       | 8.66      | 0.24                   | 3.4                   | NPQ Steady <sup>e</sup>           |                                  |                                  |                         |                                  |                                  |
| QTL1-2 | 1   | 9 729 376     | 7.04      | 0.36                   | 9.2                   |                                   |                                  |                                  | $F_V'/F_m'^f$           |                                  |                                  |
| QTL1-3 | 1   | 16 351 441    | 7.04      | 0.52                   | 5.6                   |                                   | NPQ Slope Induction <sup>f</sup> |                                  |                         |                                  |                                  |
| QTL1-4 | 1   | 16 869 695    | 8.15      | 0.79                   | 9.5                   | $F_V'/F_m'^f$                     | QY-max <sup>f</sup>              |                                  |                         |                                  |                                  |
|        |     |               |           |                        |                       | NPQ Steady <sup>f</sup>           |                                  |                                  |                         |                                  |                                  |
|        |     |               |           |                        |                       | NPQ Max <sup>f</sup>              |                                  |                                  |                         |                                  |                                  |
|        |     |               |           |                        |                       | NPQ Slope Relaxation <sup>f</sup> |                                  |                                  |                         |                                  |                                  |
| QTL1-5 | 1   | 20 680 932    | 7.93      | 0.05                   | 13.7                  |                                   |                                  |                                  |                         | NPQ Steady <sup>f</sup>          |                                  |
| QTL2-1 | 2   | 10 934 450    | 8.07      | 0.07                   | 10.1                  |                                   | $F_V'/F_m'^f$                    |                                  |                         |                                  |                                  |
| QTL2-2 | 2   | 10 984 417    | 7.95      | 0.06                   | 12.2                  |                                   | NPQ Steady <sup>e</sup>          |                                  |                         |                                  |                                  |
|        |     |               |           |                        |                       |                                   | QY-max <sup>f</sup>              |                                  |                         |                                  |                                  |
| QTL2-3 | 2   | 11 680 235    | 7.00      | 0.21                   | 6.7                   |                                   |                                  |                                  |                         |                                  | NPQ Slope Induction <sup>f</sup> |
| QTL4-1 | 4   | 1 509 645     | 7.95      | 0.19                   | 0.9                   |                                   |                                  |                                  |                         | $F_V'/F_m'^f$                    | $F_V'/F_m'^f$                    |
| QTL4-2 | 4   | 5 270 810     | 7.14      | 0.22                   | 7.5                   |                                   |                                  |                                  |                         | NPQ Slope Induction <sup>f</sup> |                                  |
| QTL4-3 | 4   | 13 911 309    | 9.13      | 0.06                   | 0.1                   |                                   |                                  |                                  | NPQ Steady <sup>e</sup> |                                  |                                  |
| QTL5-1 | 5   | 15 037 793    | 6.93      | 0.09                   | 1.4                   | NPQ Relaxation <sup>f</sup>       |                                  |                                  |                         |                                  |                                  |
| QTL5-2 | 5   | 15 930 795    | 7.27      | 0.22                   | 11.7                  |                                   |                                  |                                  |                         | NPQ Relaxation <sup>f</sup>      |                                  |
| QTL5-3 | 5   | 18 511 604    | 7.23      | 0.26                   | 2.3                   |                                   |                                  | NPQ Slope Induction <sup>f</sup> |                         |                                  |                                  |
| QTL5-4 | 5   | 25 477 423    | 7.71      | 0.11                   | 14.0                  |                                   |                                  |                                  | NPQ Steady <sup>f</sup> |                                  |                                  |
